# Supplementary material for: Bifunctional hybrid catalysts derived from Cu/Zn-based nanoparticles for single-step dimethyl ether synthesis
Source: Royal Society of Chemistry journal article supplement (doi:10.1039/c5cy01043h), 2015-08-25
Supplement: c5cy01043h1.pdf [file c5cy01043h1.pdf]

## Supporting information

### Bifunctional hybrid catalysts derived from Cu/Zn-based nanoparticles for single-step dimethyl ether synthesis

*Manuel Gentzen,<sup>1</sup> Wilhelm Habicht,<sup>1</sup> Dmitry E. Doronkin,<sup>1,2</sup> Jan-Dierk Grunwaldt,<sup>1,2</sup> Jörg Sauer,<sup>1</sup> Silke Behrens<sup>1\*</sup>*

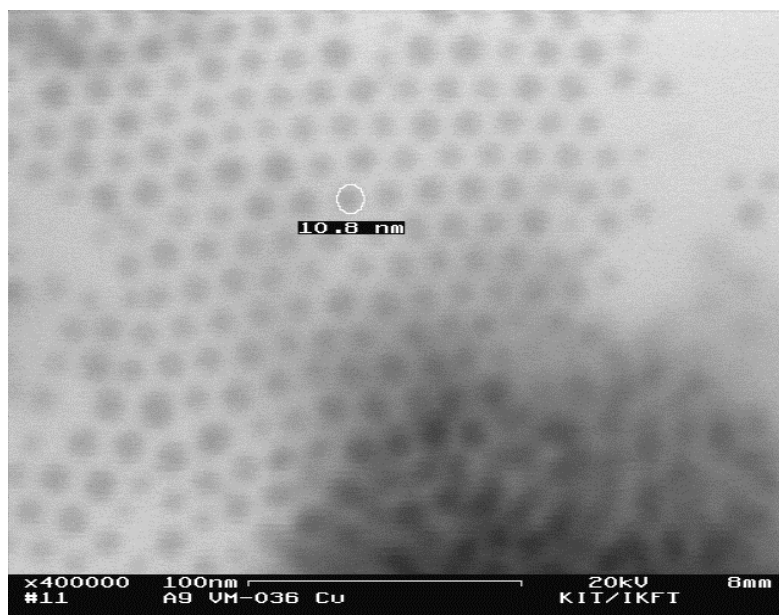

**Fig. S1.** SEM image of Cu nanoparticles (CuZn-NP-3) synthesized by thermal decomposition of  $\text{Cu}(\text{acac})_2$  in OA.

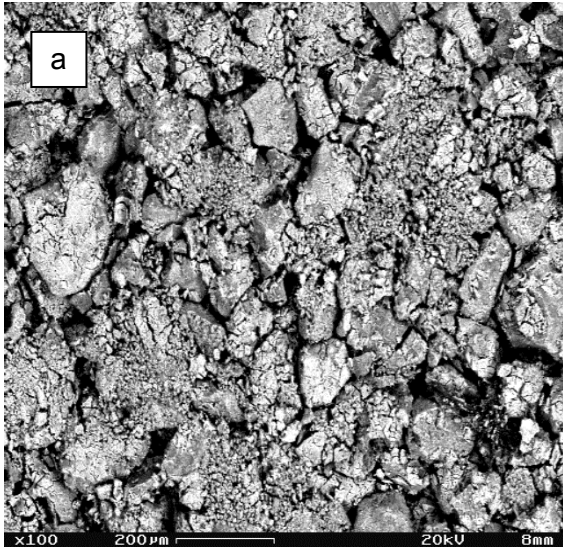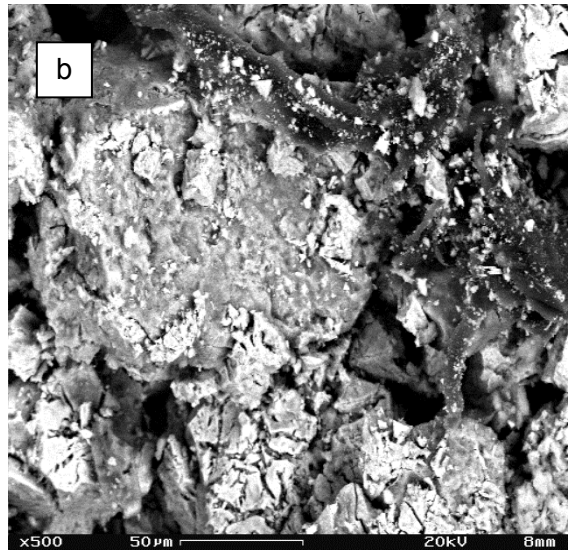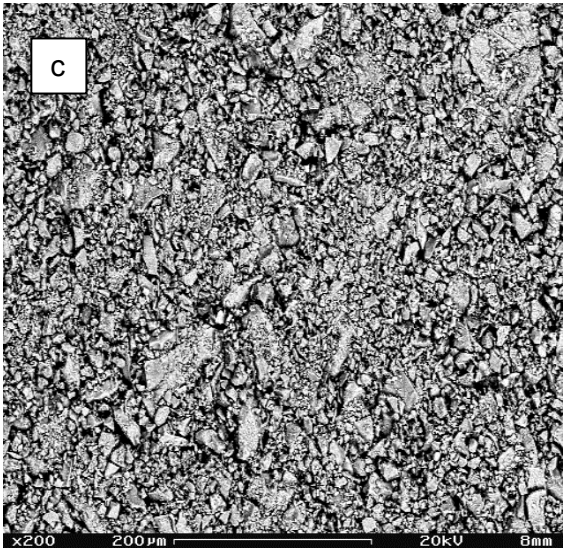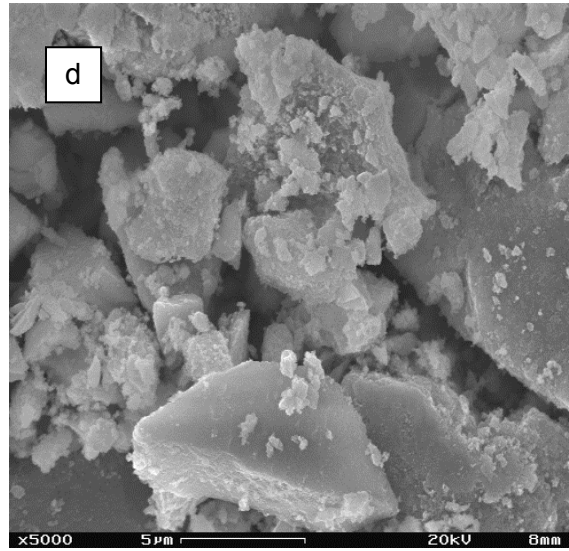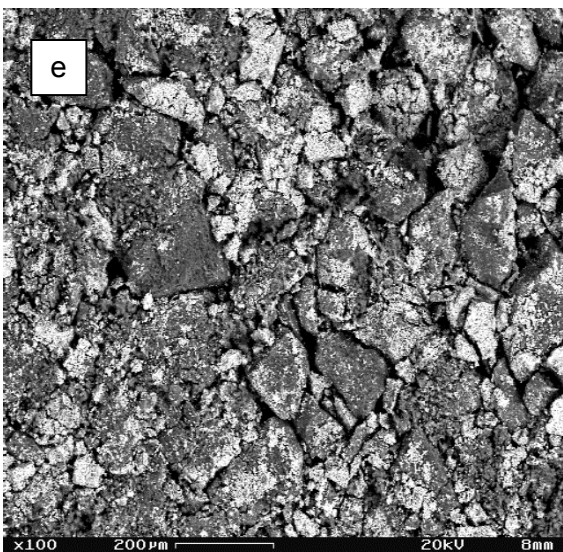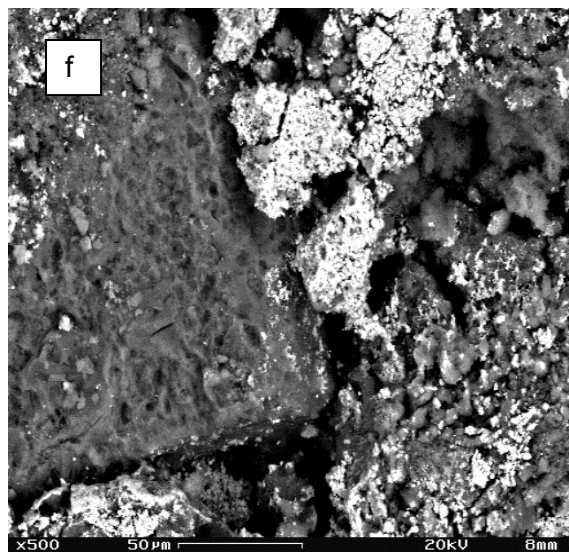

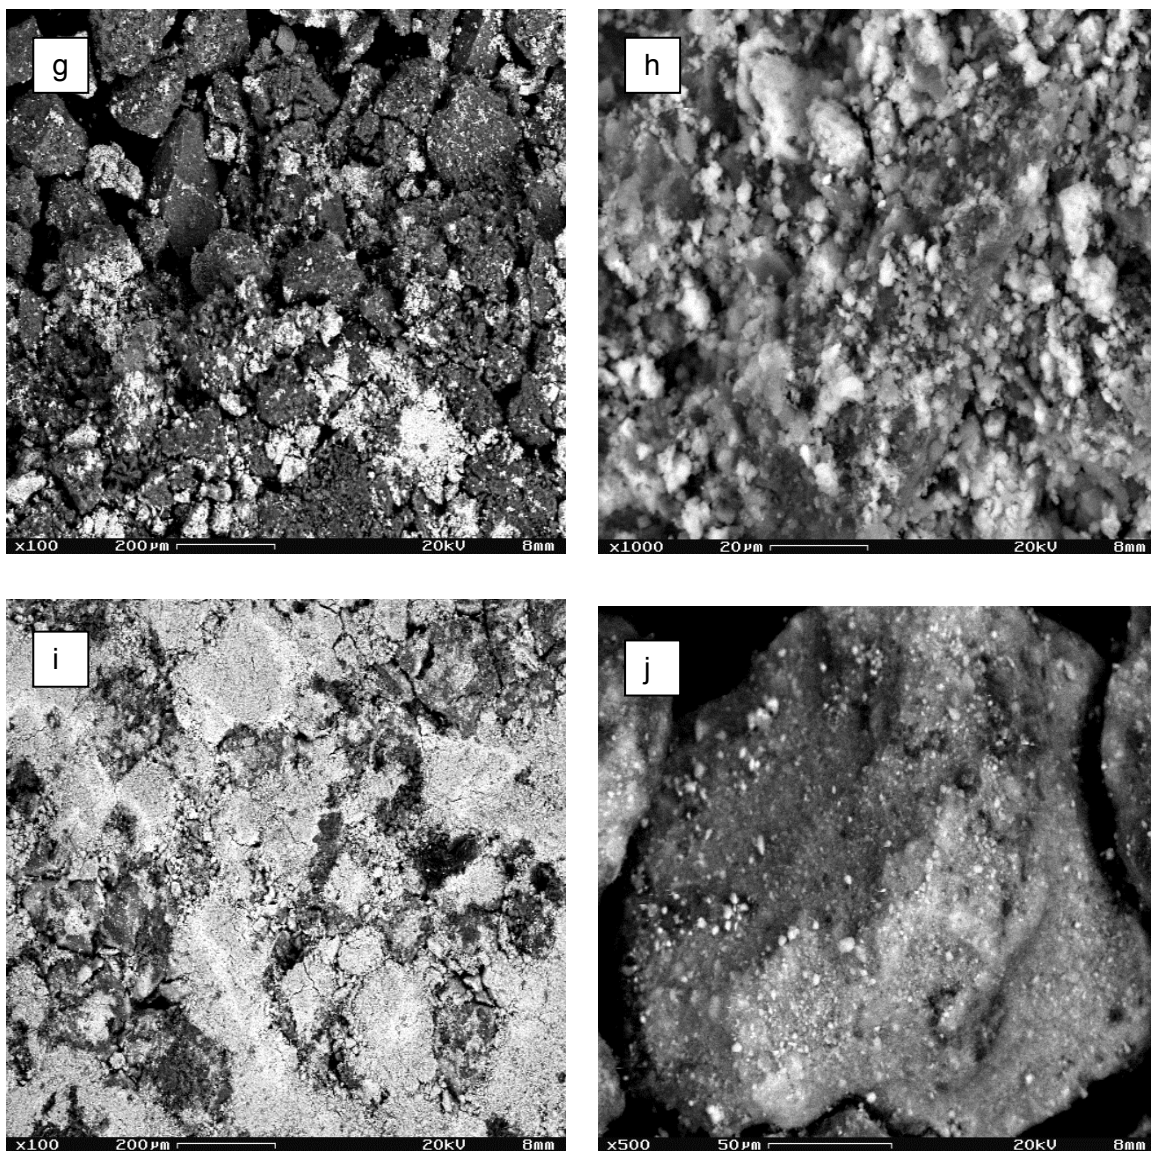

**Fig. S2.** SEM images of the calcined, bifunctional STD catalysts before catalysis: (a,b) CZA-1, (c,d) CZA-2, (e,f) CA-3, (g,h) CZA-4 and (i, j) CZA-5.

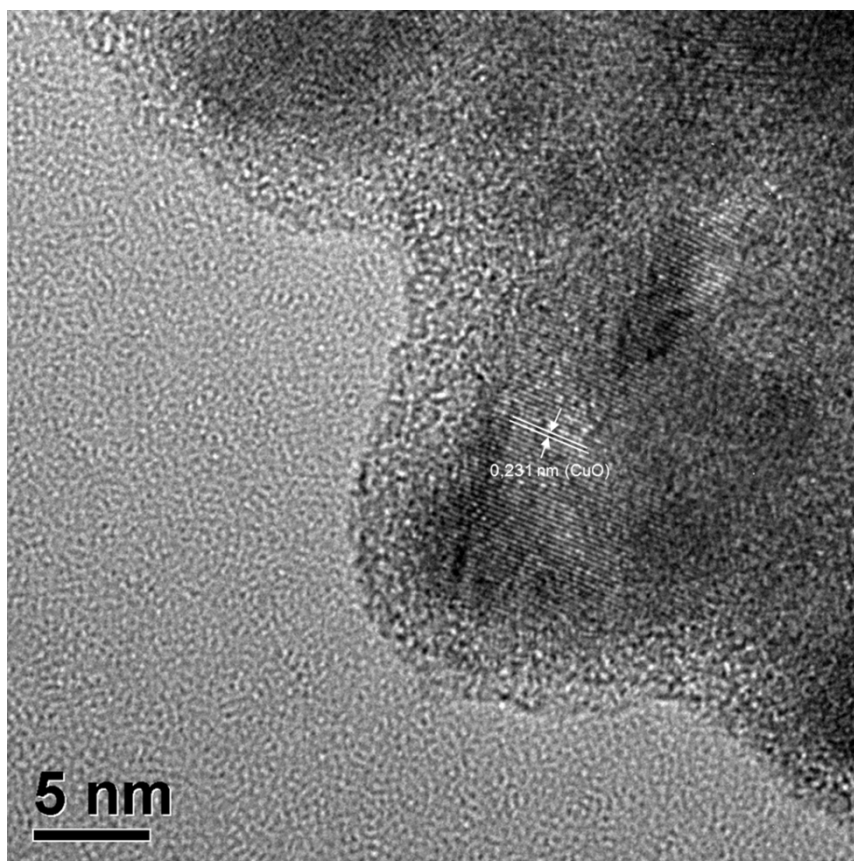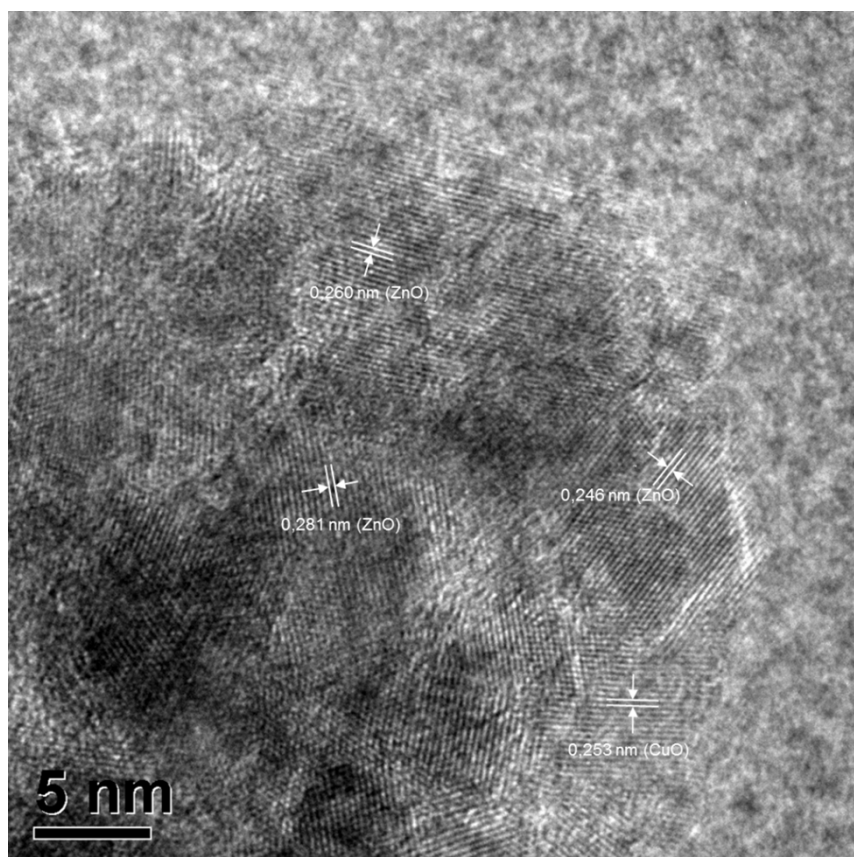

**Fig. S3.** HRTEM images of the calcined, bifunctional STD catalysts (a) CZA-1 and (b) CZA-2 before catalysis. Lattice fringes are marked by arrows and assigned to the CuO and ZnO phase of the particles.

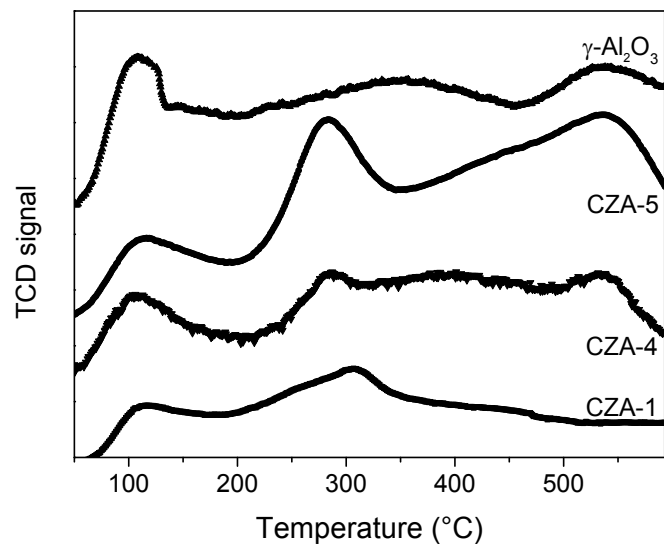

**Fig. S4.**  $\text{NH}_3$ -TPD profiles of bifunctional catalysts CAZ-1, CAZ-4, and CAZ-5.

**Table S1.** Fitting results for EXAFS spectra at Cu K edge for nanoparticles (CuZn-NP-1) and the bifunctional catalyst after reaction (CZA-1).

| Catalyst               | Cu-O distance (Å) | Coordination number (O) | Cu-Cu distance (Å) | Coordination number (Cu) | $\sigma^2$ ( $10^{-3}$ Å <sup>2</sup> ) | $\delta E_0$ (eV) | $\rho$ (%) | Corrected <sup>[a]</sup> coordination number (Cu) | Diameter of metallic cluster (Å) <sup>[b]</sup> |
|------------------------|-------------------|-------------------------|--------------------|--------------------------|-----------------------------------------|-------------------|------------|---------------------------------------------------|-------------------------------------------------|
| CuZn-NP-1              | 1.85±0.025        | 2.3±0.35                | 2.54±0.02          | 3.3±0.8                  | 9.3±2.1                                 | 4.7±2.7           | 1.4        | 4.8                                               | -                                               |
| CZA-1 (after reaction) | 1.85±0.04         | 0.8±0.3                 | 2.54±0.01          | 7.9±0.8                  | 8.7±0.9                                 | 4.0±1.1           | 0.3        | 8.6                                               | ~21                                             |

[a] Corrected to account for asymmetric pair distribution function according to [B.S. Clausen and J.K. Nørskov, *Top. Catal.* 2000, 10, 221-230]; [b] Calculated assuming spherical clusters according to Ref. [24].
